# Supplementary material
Source: Springer Nature journal article supplement (https://www.springermedizin.de/resource/supplementary/12958_2010_867_MOESM12_ESM.pdf/9569054)

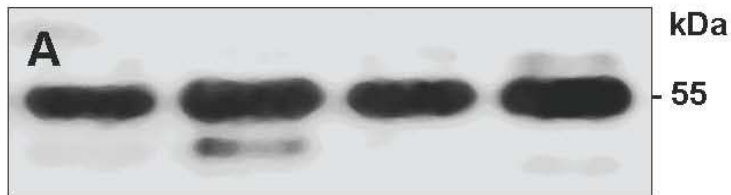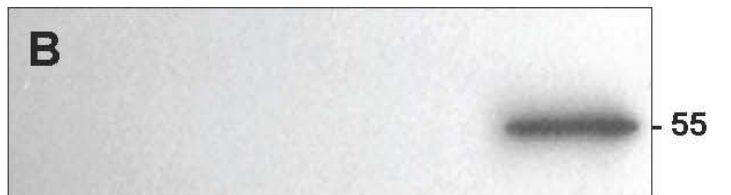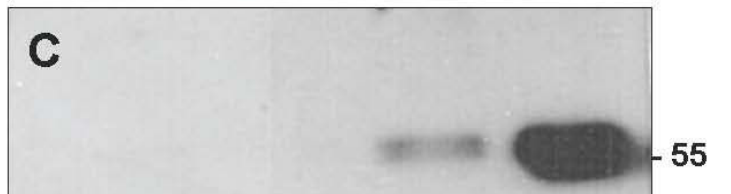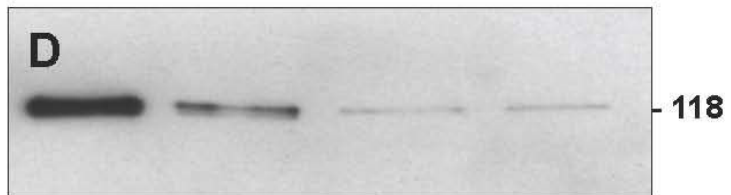

Z2

Z4

Z6

Z9

Supplement: MOESM12 [file 9569054]
